# Supplementary material for: Dietary Strategies by Foods with Antioxidant Effect on Nutritional Management of Dyslipidemias: A Systematic Review
Source: MDPI journal article supplement (doi:10.3390/antiox10020225), 2021-02-03
Supplement: s1 [file s1]

|                            | Random sequence generation (selection bias) | Allocation concealment (selection bias) | Blinding of participants and personnel (performance bias) | Blinding of outcome assessment (detection bias) | Incomplete outcome data (attrition bias) | Selective reporting (reporting bias) | Other bias |
|----------------------------|---------------------------------------------|-----------------------------------------|-----------------------------------------------------------|-------------------------------------------------|------------------------------------------|--------------------------------------|------------|
| Aghababaei, SK. 2015       | +                                           | ?                                       | ●                                                         | ●                                               | +                                        | +                                    | +          |
| Alipoor, B. 2012           | ?                                           | ?                                       | ?                                                         | ?                                               | ?                                        | ?                                    | ?          |
| Apostolidou, C. 2015       | ?                                           | ?                                       | +                                                         | ?                                               | +                                        | +                                    | +          |
| Berryman, C.E. 2013        | ?                                           | ?                                       | ●                                                         | ?                                               | ?                                        | ?                                    | ●          |
| Boaventura, BC. 2012       | ?                                           | ?                                       | ●                                                         | ●                                               | ●                                        | ?                                    | +          |
| Carvalho, R.F. 2015        | +                                           | +                                       | +                                                         | ?                                               | +                                        | +                                    | ●          |
| Chiu, HF. 2017             | ?                                           | ?                                       | ?                                                         | ?                                               | +                                        | ?                                    | +          |
| Dourado Grace K. Z.S. 2015 | ●                                           | ●                                       | ●                                                         | ●                                               | ●                                        | ?                                    | ●          |
| Huguenin, G.V 2015         | +                                           | +                                       | +                                                         | ?                                               | +                                        | +                                    | ●          |
| Jalali-Khanabadi, BA. 2010 | ●                                           | ●                                       | ●                                                         | ●                                               | ?                                        | ?                                    | ?          |
| Lee, YJ. 2016              | +                                           | +                                       | +                                                         | ?                                               | +                                        | +                                    | +          |
| Martinez-López, S. 2019    | ?                                           | ?                                       | ●                                                         | ?                                               | +                                        | +                                    | +          |
| Rahbar, A.R. 2015          | ?                                           | ?                                       | ?                                                         | ?                                               | +                                        | ?                                    | +          |
| Ross E. 2004               | ?                                           | ?                                       | ?                                                         | ?                                               | ?                                        | ?                                    | ●          |
| Visioli, F. 2005           | ?                                           | ?                                       | ●                                                         | ?                                               | +                                        | ?                                    | +          |
| Yu-Ling, L. 2011           | ●                                           | ●                                       | ●                                                         | ●                                               | ?                                        | ?                                    | +          |
